# Supplementary figures and images for: Anthropogenic Factors Affecting the Vegetation Dynamics in the Arid Middle East
Source: Preprints.org preprint supplement (doi:10.20944/preprints202010.0208.v2), 2020-12-15

**SUPPLEMENT 1**


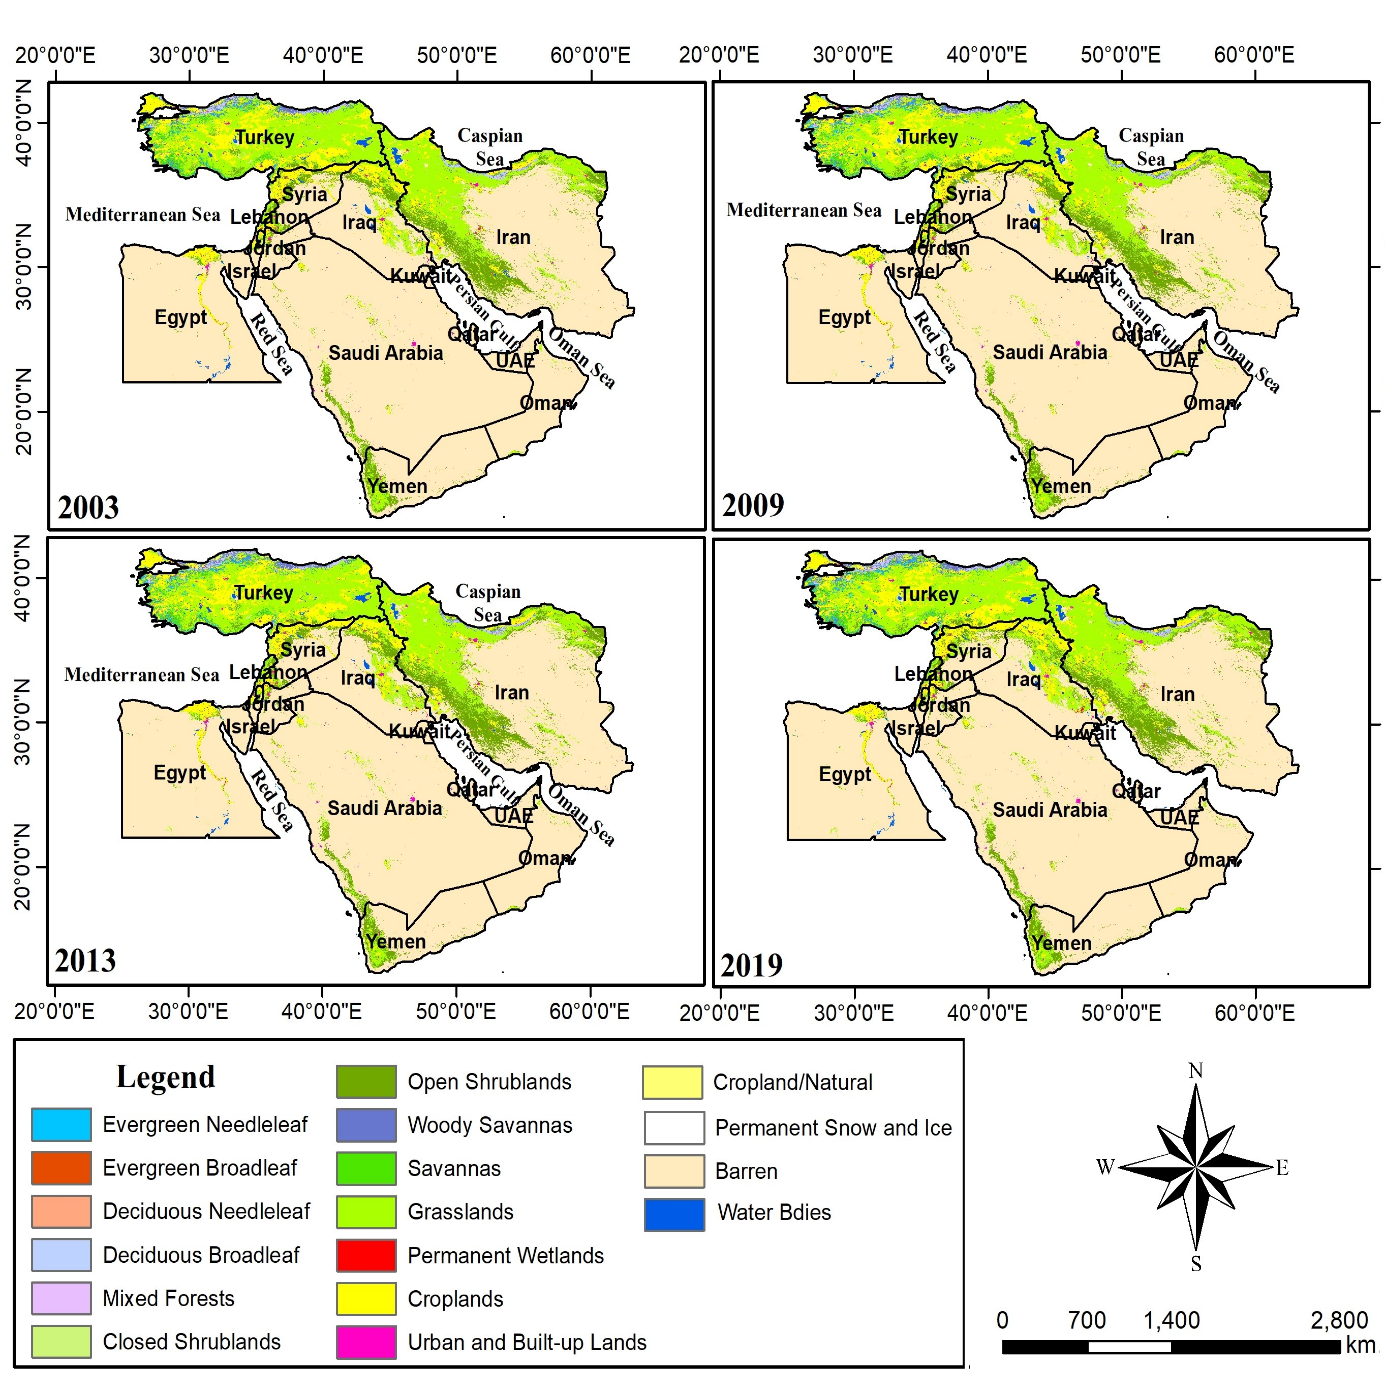


**Figure S1.** Maps presenting the land cover types from MODIS (MCD12Q1) images for 2003, 2009, 2013, and 2019.

Supplement: Supplementary file 1 [file supplementary]
